# Supplementary material
Source: publisher figshare collection journal article supplement (https://asha.figshare.com/articles/dataset/_/21957134)
Supplement: Supplementary file 4 [file 1]

#### **Supplemental Material S4.** Premeasurement image scaling in ImageJ (v1.53p).

With a known or estimated pixel aspect ratio (PAR), ImageJ can scale a distorted image before making measurements using the image scale command. In the scale dialog, set "X Scale" and "Y Scale" values as width and height of the pixels, respectively, divided by the shorter of the two. For example, to square up PAR = 10:11 image, set "X Scale" to be  $10/10 = 1.0$  and "Y Scale" to be  $11/10 = 1.1$ .

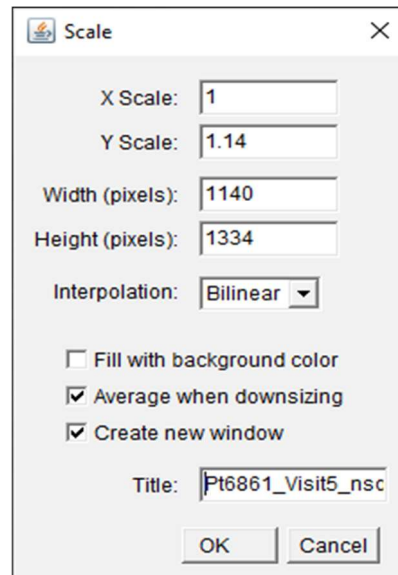

Figure SM.3. ImageJ Scale Dialog Screenshot.
